# Supplementary material for: Factors Influencing Quality of Life in Breast Cancer Patients Six Months after the Completion of Chemotherapy
Source: Diseases. 2019 Feb 24;7(1):26. doi: 10.3390/diseases7010026 (PMC6473656; doi:10.3390/diseases7010026)
Supplement: Supplementary file 1 [file diseases-07-00026-s001.pdf]

**Table 1.** Association between age categories and clinical and demographic characteristics.

| Characteristics                          | 29-39<br>years old       | 40-49<br>years old   | 50-59 years<br>old       | Over 60<br>years old      | $\chi^2(df, p)$                 |
|------------------------------------------|--------------------------|----------------------|--------------------------|---------------------------|---------------------------------|
| <b>Menopausal status</b>                 |                          |                      |                          |                           | 46.06, p<br><.0005 <sup>2</sup> |
| Pre-menopausal                           | 8 (66.7%) <sup>c,d</sup> | 6 (30%) <sup>a</sup> | 0 (0%) <sup>a</sup>      | 0 (0%)                    |                                 |
| Post-menopausal                          | 0 (0%) <sup>c</sup>      | 3 (15%) <sup>c</sup> | 11(84.6%) <sup>a,b</sup> | 15 (93.8%) <sup>a,b</sup> |                                 |
| Menopausal due to treatment              | 4 (33.3%)                | 11(55%) <sup>d</sup> | 2 (15.4%)                | 1 (6.3%) <sup>b</sup>     |                                 |
| <b>Treatment Type</b>                    |                          |                      |                          |                           | 2.71 (3),<br>p = 46             |
| Chemotherapy &surgery                    | 6 (50%)                  | 12 (60%)             | 4 (30.8%)                | 8 (50%)                   |                                 |
| Chemotherapy &surgery&hormone<br>therapy | 6 (50%)                  | 6 (40%)              | 9 (69.2%)                | 8 (50%)                   |                                 |
| <b>Surgery</b>                           |                          |                      |                          |                           | 1.53, p =<br>69 <sup>2</sup>    |
| Lumpectomy                               | 9 (75%)                  | 17 (85%)             | 10 (76.9%)               | 11 (68.8%)                |                                 |
| Mastectomy                               | 3 (25%)                  | 3 (15%)              | 3 (23.1%)                | 5 (31.3%)                 |                                 |
| <b>Hematocrit</b>                        |                          |                      |                          |                           | .72, p =<br>92 <sup>2</sup>     |
| Low levels                               | 3 (25%)                  | 7 (35%)              | 5 (38.5%)                | 6 (37.5%)                 |                                 |
| Normal levels                            | 9 (75%)                  | 13 (65%)             | 8 (61.5%)                | 10 (62.5%)                |                                 |
| <b>Hemoglobin</b>                        |                          |                      |                          |                           | 3.87, p =<br>.29 <sup>2</sup>   |
| Low levels                               | 1 (8.3%)                 | 7 (35%)              | 5 (38.5%)                | 6 (37.5%)                 |                                 |
| Normal levels                            | 11 (91.7%)               | 13 (65%)             | 8 (61.5%)                | 10 (62.5%)                |                                 |
| <b>White count</b>                       |                          |                      |                          |                           | .75, p =<br>.90 <sup>2</sup>    |
| Low levels                               | 4 (33.3%)                | 7 (35%)              | 5 (45.5%)                | 7 (43.8%)                 |                                 |
| Normal levels                            | 8 (66.6%)                | 13 (65%)             | 6 (54.5%)                | 9 (56.3%)                 |                                 |
| <b>Duration of education</b>             |                          |                      |                          |                           | .933, p =<br>.12 <sup>2</sup>   |

|                                                                          |                              |                     |           |                        |
|--------------------------------------------------------------------------|------------------------------|---------------------|-----------|------------------------|
| Primary education                                                        | 1 (8.3%)                     | 5 (25%)             | 2 (15.4%) | 7 (46.7%)              |
| Secondary education (Middle + High School Graduates)                     | 5 (41.7%)                    | 5 (25%)             | 7 (53.8%) | 6 (40%)                |
| Higher Education (University /Technological Institute or MA/PhD degrees) | 6 (50%)                      | 10 (50%)            | 4 (30.8%) | 2 (13.3%)              |
| <b>Work status</b>                                                       | 23.89, p = .001 <sup>2</sup> |                     |           |                        |
| Blue collar                                                              | 1 (8.3%)                     | 5 (8.2%)            | 1 (7.7%)  | 0 (0%)                 |
| White collar                                                             | 6 (50%) <sup>d</sup>         | 7 (35%)             | 4 (30.8%) | 0 (0%) <sup>a</sup>    |
| Housemakers                                                              | 5 (41.7%)                    | 7 (35%)             | 6 (46.2%) | 8 (50%)                |
| Retired                                                                  | 0 (0%) <sup>d</sup>          | 1 (5%) <sup>d</sup> | 2 (15.4%) | 8 (50%) <sup>a,b</sup> |

<sup>1</sup>a: statistically different from 29-39y, b: statistically different from 40-49y, c: 50-59y, d: over 60y;

<sup>2</sup>Fisher's exact test.

**Table 2.** Associations between treatment type and demographic and clinical characteristics.

| Characteristics             | Chemotherapy & surgery | Chemotherapy & surgery & hormone therapy | $\chi^2(df), p$ |
|-----------------------------|------------------------|------------------------------------------|-----------------|
| <b>Menopausal status</b>    | 1.99(2), p = .37       |                                          |                 |
| Pre-menopausal              | 9 (30%)                | 5 (16.1%)                                |                 |
| Post-menopausal             | 12 (40%)               | 17 (54.8%)                               |                 |
| Menopausal due to treatment | 9 (30%)                | 9 (29%)                                  |                 |
| <b>Surgery</b>              | 3.09 (1), p = .08      |                                          |                 |
| Lumpectomy                  | 26 (55.3%)             | 4 (28.6%)                                |                 |
| Mastectomy                  | 21 (44.7%)             | 10 (71.4%)                               |                 |
| <b>Hematocrit</b>           | .51(1), p = .47        |                                          |                 |
| Low levels                  | 9 (30%)                | 12 (38.7%)                               |                 |
| Normal levels               | 21 (70%)               | 19 (61.3%)                               |                 |
| <b>Hemoglobin</b>           | .55(1), p = .46        |                                          |                 |
| Low levels                  | 8 (26.7%)              | 11 (35.5%)                               |                 |

|                                                                          |            |            |                  |
|--------------------------------------------------------------------------|------------|------------|------------------|
| Normal levels                                                            | 22 (73.3%) | 20 (64.5%) |                  |
| <b>White count</b>                                                       |            |            | .49(1), p = .49  |
| Low levels                                                               | 10 (34.5%) | 13 (43.3%) |                  |
| Normal levels                                                            | 19 (65.5%) | 17 (56.7%) |                  |
| <b>Duration of education</b>                                             |            |            | .11(2), p = 1    |
| Primary education                                                        | 7 (23.3%)  | 8 (26.7%)  |                  |
| Secondary education (Middle + High School Graduates)                     | 12 (40%)   | 11 (36.7%) |                  |
| Higher Education (University /Technological Institute or MA/PhD degrees) | 11 (36.7%) | 11 (36.7%) |                  |
| <b>Work status</b>                                                       |            |            | 2.04(2), p = .57 |
| Blue collar                                                              | 5 (16.7%)  | 2 (6.5%)   |                  |
| White collar                                                             | 9 (30%)    | 8 (25.8%)  |                  |
| Housemakers                                                              | 11 (36.7%) | 15 (48.4%) |                  |
| Retired                                                                  | 5 (16.7%)  | 6 (19.4%)  |                  |

**Table 3.** Associations between surgery type and demographic and clinical characteristics.

| Characteristics                | Lumpectomy              | Mastectomy                     | $\chi^2(df), p$            |
|--------------------------------|-------------------------|--------------------------------|----------------------------|
| <b>Menopausal status</b>       |                         |                                | 6.23, p = .04 <sup>1</sup> |
| a. Pre-menopausal              | 14 (29.8%) <sup>c</sup> | 0 (0%) <sup>lumpectomy,c</sup> |                            |
| b. Post-menopausal             | 21 (44.7%)              | 8 (57.1%)                      |                            |
| c. Menopausal due to treatment | 12 (25.5%) <sup>a</sup> | 6 (42.9%) <sup>a</sup>         |                            |
| <b>hematocrit</b>              |                         |                                | .01, p = 1 <sup>2</sup>    |
| Low levels                     | 16 (34%)                | 5 (35.7%)                      |                            |
| Normal levels                  | 31 (66%)                | 9 (64.3%)                      |                            |
| <b>Hemoglobin</b>              |                         |                                | 1.16(1), p = .33           |
| Low levels                     | 13 (27.7%)              | 6 (42.9%)                      |                            |

|                                                                             |            |           |                    |
|-----------------------------------------------------------------------------|------------|-----------|--------------------|
| Normal levels                                                               | 34 (72.3%) | 8 (57.1%) |                    |
| <b>White count</b>                                                          |            |           | 2.55(1), =<br>.11  |
| Low levels                                                                  | 15 (33.3%) | 8 (57.1%) |                    |
| Normal levels                                                               | 30 (66.7%) | 6 (42.9%) |                    |
| <b>Duration of education</b>                                                |            |           | 2.09(2), p<br>=.37 |
| Primary education                                                           | 10 (21.7%) | 5 (33.3%) |                    |
| Secondary education (Middle + High School Graduates)                        | 17 (37%)   | 6 (42.9%) |                    |
| Higher Education (University /Technological Institute or<br>MA/PhD degrees) | 19 (41.3%) | 3 (21.4%) |                    |
| <b>Work status</b>                                                          |            |           | 3.07, p = .36      |
| Blue collar                                                                 | 7 (14.9%)  | 0 (0%)    |                    |
| White collar                                                                | 14 (29.8%) | 3 (21.4%) |                    |
| Housemakers                                                                 | 18 (38.3%) | 8 (57.1%) |                    |
| Retired                                                                     | 8 (17%)    | 3 (21.4%) |                    |

<sup>1</sup>Fisher's exact test, <sup>2</sup>Pearson's chi-square exact test
